# Supplementary material for: The first juvenile dromaeosaurid (Dinosauria: Theropoda) from Arctic Alaska
Source: PLoS One. 2020 Jul 8;15(7):e0235078. doi: 10.1371/journal.pone.0235078 (PMC7343144; doi:10.1371/journal.pone.0235078)
Supplement: S2 Dataset — Morphometric scoring for DMNH 21183 and modified datasets for multivariate analyses (PCA and DFA) in Gerke and Wings [39] and Larson and Currie [40]. Systematic entries follow methodology as described in the Material and Methods section. Original datasets with specimen-level denominations can be found in Gerke and Wings (https://doi.org/10.1371/journal.pone.0158334.s001) and Larson and Currie (https://doi.org/10.1371/journal.pone.0054329.s001). (XLSX) [file pone.0235078.s009.xlsx]

## Sheet: DMNH21183 in Gerke & Wings 2016
ID	CBL	CBW	CH	DSDI
Abelisauridae	7.88	3.47	12.45	0.857143
Abelisauridae	8.81	7.2	19.88	1
Abelisauridae	9.33	5.36	14.48	1.36364
Abelisauridae	10.91	8.48	22	0.941176
Abelisauridae	11.26	5.79	18.73	1
Abelisauridae	11.72	6.29	16.19	1.21905
Abelisauridae	12.28	6.7	17.87	1.06195
Abelisauridae	12.41	9.26	27.05	1
Abelisauridae	12.51	8.3	27.69	0.909091
Abelisauridae	12.53	6.69	19.21	1.11429
Abelisauridae	12.66	7.12	19.93	1.2
Abelisauridae	12.82	8.59	23.76	1.08
Abelisauridae	12.88	5.25	18.71	1.04274
Abelisauridae	12.99	9.46	30.11	0.956522
Abelisauridae	13.17	7.05	23	1.15789
Abelisauridae	13.3	8.56	25.37	1.15789
Abelisauridae	13.5	7.77	25.75	0.904762
Abelisauridae	13.53	8.27	22.87	1.05556
Abelisauridae	13.9	7.9	24.08	0.95
Abelisauridae	14.24	7.72	25.13	1
Abelisauridae	16.9	8.67	37.63	1.07527
Abelisauridae	17.1	8.81	35.01	1.2
Abelisauridae	18.17	9.1	38.68	1.07778
Abelisauridae	18.3	8.62	36.9	0.944444
Abelisauridae	18.37	9.21	38.08	1.05556
Abelisauridae	18.93	8.86	35.54	1
Allosauridae	10.63	9.77	24.62	0.909091
Allosauridae	11.77	8.26	25.8	1.33333
Allosauridae	12	11.07	20.69	1
Allosauridae	12.08	7.45	25.43	0.8
Allosauridae	12.46	11.97	25.49	1
Allosauridae	12.79	10.5	34.2	0.95
Allosauridae	13.04	9.28	26.98	0.909091
Allosauridae	13.73	10.65	33.19	0.954545
Allosauridae	14.05	12.52	34.31	1
Allosauridae	14.06	7.59	28.5	0.964286
Allosauridae	14.78	7.21	25.52	0.833333
Allosauridae	14.99	7.33	30.02	1.15
Allosauridae	15.22	7.04	33.48	1
Allosauridae	15.5	14.9	36.81	0.95
Allosauridae	16	14.6	33.89	0.902913
Allosauridae	16.01	8.23	34.05	1.28
Allosauridae	16.1	13.82	40.61	0.909091
Allosauridae	16.1	15.3	33.9	0.95
Allosauridae	16.3	13.5	37.69	0.98
Allosauridae	17.32	13.03	38.25	0.826087
Allosauridae	17.5	12.8	38.85	1
Allosauridae	20.36	12.29	49.57	1
Basal Theropoda	3.9	1.49	5.4	1.14286
Basal Theropoda	4.1	1.37	8.9	1.06383
Basal Theropoda	4.4	1.63	11.6	1
Basal Theropoda	5.09	3.5	8.02	1.2
Basal Theropoda	5.2	1.7	6.2	1
Basal Theropoda	5.4	1.85	7.5	1.14286
Basal Theropoda	5.5	1.71	9.7	1
Basal Theropoda	5.85	3	8.84	1.2
Basal Theropoda	5.9	1.79	9.3	1
Basal Theropoda	6.62	2.5	8.83	1.75
Basal Theropoda	6.63	2.5	11.23	1.16667
Basal Theropoda	6.97	3.5	10.61	1.25
Basal Theropoda	7.44	3	10.26	1.2
Basal Theropoda	8.34	3.5	10.53	1.25
Carcharodontosauridae	14.42	11.77	29.46	1.00752
Carcharodontosauridae	15.37	9.1	16.04	0.748503
Carcharodontosauridae	17.11	8.55	25.03	1.2
Carcharodontosauridae	20.42	11.46	33.13	0.666667
Carcharodontosauridae	21.7	16.26	52.23	1.07092
Carcharodontosauridae	22.43	10.87	33.79	0.9375
Carcharodontosauridae	23.91	17.1	58.55	1.06385
Carcharodontosauridae	24.96	13.22	38.96	1.09677
Carcharodontosauridae	26.08	16.58	43.01	1.12782
Carcharodontosauridae	26.64	11.78	39.4	1.12319
Carcharodontosauridae	26.73	17.56	62.6	0.84507
Carcharodontosauridae	26.84	16.56	72.35	0.905109
Carcharodontosauridae	28.26	14.35	47.47	1.17241
Carcharodontosauridae	28.98	16.54	68.15	1
Carcharodontosauridae	29.11	14.43	54.97	0.977444
Carcharodontosauridae	29.11	19.33	70.62	1.15652
Carcharodontosauridae	29.63	17.63	72.23	0.903333
Carcharodontosauridae	30.6	18.75	60.48	1.02308
Carcharodontosauridae	31.1	17.19	64.85	0.963636
Carcharodontosauridae	31.35	16.71	62.15	1.09375
Carcharodontosauridae	31.94	16.73	66.78	0.758389
Carcharodontosauridae	33.82	22.83	81.62	0.894737
Carcharodontosauridae	35.24	20.59	79.23	0.91791
Carcharodontosauridae	36.6	20.64	87.09	0.889706
Carcharodontosauridae	37.21	21.44	90.75	0.718954
Carcharodontosauridae	37.3	20.32	79.26	0.947368
Carcharodontosauridae	39.91	14.49	73.99	0.97561
Carcharodontosauridae	40.79	17.86	82.3	1.08333
Carcharodontosauridae	41.04	14.88	73.96	0.855556
Carcharodontosauridae	41.17	14.88	73.17	0.988889
Carcharodontosauridae	41.46	15.15	71.01	0.888889
Carcharodontosauridae	41.53	15.09	80.68	0.8
Carcharodontosauridae	42.07	20.74	93.08	0.992248
Carcharodontosauridae	46.65	16.88	97.55	0.888889
Ceratosauridae	17.2	11.3	43.65	1.17545
Ceratosauridae	17.8	6.4	32.3	1.01053
Ceratosauridae	18.6	9.1	41.8	0.985185
Ceratosauridae	18.88	10.57	48	0.807692
Ceratosauridae	19.91	10.32	46	1.04167
Ceratosauridae	20.26	14.31	38.69	1.0625
Ceratosauridae	20.79	9.12	38.11	1.14286
Ceratosauridae	21.48	12.57	47.3	1.01391
Ceratosauridae	22.64	13.9	39.65	1.28571
Ceratosauridae	23	16.81	41.89	1.0625
Ceratosauridae	24.04	14.88	41.66	0.888889
Ceratosauridae	25.47	15.1	51.32	1
Ceratosauridae	25.86	14.79	31.63	1.0625
Ceratosauridae	27.52	10.53	52.38	1.16667
Ceratosauridae	29.61	12.88	61.71	1.1
Ceratosauridae	32.95	14	75	1.16364
DMNH21183	2.3	1.05	4.5	2.33333
Dromaeosauridae	2.42	1.17	4.25	1.16667
Dromaeosauridae	3.11	0.8	4.69	1.33333
Dromaeosauridae	3.3	1.54	4.38	1
Dromaeosauridae	3.55	1.54	5.85	1
Dromaeosauridae	3.95	1.61	6.93	1.5
Dromaeosauridae	4.17	1.45	6.7	1.27273
Dromaeosauridae	4.35	2.15	7.91	1.25
Dromaeosauridae	5.07	3	8.85	1.44186
Dromaeosauridae	5.35	2.41	6.53	1.65714
Dromaeosauridae	5.56	3.27	8.52	0.971429
Dromaeosauridae	5.74	3.2	10.8	1
Dromaeosauridae	6.09	3.81	11.55	0.92
Dromaeosauridae	6.11	2.58	8.77	1.6185
Dromaeosauridae	6.28	3.13	10.68	0.94
Dromaeosauridae	6.47	3.91	11.22	0.971429
Dromaeosauridae	6.56	3.89	11.27	0.971429
Dromaeosauridae	6.69	3.32	10.98	1
Dromaeosauridae	6.74	2.8	9.14	1.6573
Dromaeosauridae	6.76	2.93	9.56	1.68712
Dromaeosauridae	6.84	3.7	11.58	0.8
Dromaeosauridae	7.04	3.2	12.23	1.57143
Dromaeosauridae	7.07	3.2	10.07	1.68571
Dromaeosauridae	7.13	4	13.58	1.66667
Dromaeosauridae	7.15	3.23	11.01	1.62857
Dromaeosauridae	7.21	4.06	12.86	0.811765
Dromaeosauridae	7.64	4.02	12.38	1
Metriacanthosauridae	16.2	7.5	45	1.07143
Metriacanthosauridae	18.7	7.4	48.3	1.07692
Metriacanthosauridae	21.5	10.3	49	1.08333
Neovenatoridae	13.71	7.8	20.62	0.833333
Neovenatoridae	14.28	7.71	24.87	1
Neovenatoridae	18.12	9.79	36.63	1.03448
Noasauridae	2.81	2.2	5.87	1.2636
Noasauridae	3.27	1.93	6.52	1.2636
Noasauridae	4.47	3.93	7.46	1.17241
Noasauridae	4.62	2.5	11.64	2
Noasauridae	4.94	2.42	6.8	1.125
Noasauridae	4.94	2.42	8.58	1.202
Noasauridae	5.3	2.28	6.96	1.2
Noasauridae	5.47	2.22	8.86	1.57485
Noasauridae	6.27	3.14	11.39	1.11111
Noasauridae	7.09	3.48	10.44	0.945946
Non-spinosaurid Megalosauroidea	8.3	6	17	1.04348
Non-spinosaurid Megalosauroidea	9.1	4.3	12.8	1
Non-spinosaurid Megalosauroidea	9.8	5.2	16	1.0375
Non-spinosaurid Megalosauroidea	10	5.4	17.6	1.09375
Non-spinosaurid Megalosauroidea	10.5	7.7	22	1
Non-spinosaurid Megalosauroidea	17.26	8.98	35.32	1.25
Non-spinosaurid Megalosauroidea	18.2	8.32	29.29	0.75
Non-spinosaurid Megalosauroidea	20.9	11.8	38.92	0.954545
Non-spinosaurid Megalosauroidea	23.26	14.15	52.27	1.25
Non-spinosaurid Megalosauroidea	23.5	12.06	48.85	0.846154
Non-spinosaurid Megalosauroidea	24.12	12.8	46.54	1.017
Non-spinosaurid Megalosauroidea	24.3	12.8	51.09	0.772727
Non-spinosaurid Megalosauroidea	27.6	11.7	61.1	0.8
Non-spinosaurid Megalosauroidea	31.2	20.2	85.8	1
Non-spinosaurid Megalosauroidea	39.76	19.17	103.26	0.857143
Non-spinosaurid Megalosauroidea	45.52	16.4	106.4	1
Proceratosauridae	3.5	2.9	6.5	1.28571
Proceratosauridae	4.4	3.1	9	1.42857
Proceratosauridae	5.4	3.4	9.3	1.42857
Proceratosauridae	5.4	3.5	11	1.28571
Proceratosauridae	6.4	3.3	11.2	1.2
Proceratosauridae	6.7	3.3	12.6	1.28571
Proceratosauridae	6.7	3.4	12.2	1.2
Proceratosauridae	6.9	3.5	12.8	1.5
Spinosauridae	10.49	7.9	23.72	1
Spinosauridae	11.69	11.19	28.72	1
Spinosauridae	12.12	10.35	27.19	1
Spinosauridae	13.06	11.24	31.37	1
Spinosauridae	13.18	10.88	29.67	1
Spinosauridae	15.76	12.05	34.8	1
Spinosauridae	16.42	15.19	38.55	1
Spinosauridae	16.47	13.65	34.12	1
Spinosauridae	18.7	13.3	52.66	0.833429
Spinosauridae	18.9	15.2	62.94	1.06073
Spinosauridae	19.2	14.4	54.34	1.00586
Spinosauridae	20.8	18.1	56.94	1.08037
Troodontidae	4.45	1.62	7.25	1
Troodontidae	4.92	2.43	7.22	1.76991
Troodontidae	5.2	2.33	7.84	1
Troodontidae	5.6	2.71	8.47	0.8
Troodontidae	6	3.03	9.39	1.13636
Tyrannosauridae	8.1	3.3	10	0.972973
Tyrannosauridae	9.5	4.8	16.8	1.28571
Tyrannosauridae	9.8	4.2	19.4	1.14562
Tyrannosauridae	11	6	17	0.966667
Tyrannosauridae	11.8	7	24	1.11111
Tyrannosauridae	11.99	5.59	18.2	1
Tyrannosauridae	12	5.49	18	1.21429
Tyrannosauridae	12.44	6.7	22.85	1.03704
Tyrannosauridae	12.66	4.92	19.85	0.9375
Tyrannosauridae	12.7	6.74	22	1.07143
Tyrannosauridae	12.8	5.6	22.5	1.0625
Tyrannosauridae	15.01	9.22	15.85	0.866242
Tyrannosauridae	15.81	5.99	26.49	1.07143
Tyrannosauridae	16	6.25	26	0.964286
Tyrannosauridae	16.2	11	17.75	0.857143
Tyrannosauridae	18.02	12.68	36.43	1.07143
Tyrannosauridae	18.37	10.35	22.51	0.75
Tyrannosauridae	18.52	13.56	21.91	1.00714
Tyrannosauridae	18.96	13.2	29.72	0.75
Tyrannosauridae	19.1	14	27.02	0.785714
Tyrannosauridae	19.19	12.17	34.93	1.25455
Tyrannosauridae	21.25	14.57	31.96	1.07857
Tyrannosauridae	21.5	16.32	34.05	0.769231
Tyrannosauridae	22.32	12.29	46.78	1.28
Tyrannosauridae	22.5	12.83	32.08	1
Tyrannosauridae	22.53	16.63	49.57	1.11111
Tyrannosauridae	22.86	17.28	54.55	0.981308
Tyrannosauridae	22.88	17.81	52.62	1.13
Tyrannosauridae	23.64	16.61	30.34	1.00917
Tyrannosauridae	23.98	16.12	32.38	1.14286
Tyrannosauridae	24.47	18.46	53.37	1
Tyrannosauridae	25.56	18.09	35.01	0.863636
Tyrannosauridae	25.92	16.46	37.57	0.952381
Tyrannosauridae	26.23	18.32	45.17	1.01124
Tyrannosauridae	26.37	17.7	44.57	1.3
Tyrannosauridae	26.47	19.13	44.29	0.714286
Tyrannosauridae	27	22.63	74.78	1.09091
Tyrannosauridae	27.38	14.27	44.22	0.959596
Tyrannosauridae	27.86	18.18	45.96	1.1
Tyrannosauridae	28.05	20.44	41.56	0.951923
Tyrannosauridae	28.8	19	48.26	0.615385
Tyrannosauridae	28.83	19.82	55.99	1.1
Tyrannosauridae	29.25	19.01	48.55	1.0098
Tyrannosauridae	29.84	16.45	42.55	0.947917
Tyrannosauridae	29.93	16.94	43.64	1.025
Tyrannosauridae	30.05	19.03	52.8	1.03448
Tyrannosauridae	30.2	23.9	51.94	0.72
Tyrannosauridae	30.49	22.12	45.63	1.14444
Tyrannosauridae	30.62	21.42	46.83	0.967391
Tyrannosauridae	30.92	20.59	55.57	0.941176
Tyrannosauridae	30.94	19.46	45.42	0.894737
Tyrannosauridae	30.97	20.17	51.14	0.917647
Tyrannosauridae	31.5	21	55	1.05882
Tyrannosauridae	31.75	18.04	50.14	1.05882
Tyrannosauridae	31.86	21.18	54.62	1.01124
Tyrannosauridae	32.08	21.86	55.34	0.959596
Tyrannosauridae	32.59	26.99	56.6	1.0375
Tyrannosauridae	33.12	24.75	54.12	0.9
Tyrannosauridae	33.38	23.15	50.54	0.904255
Tyrannosauridae	33.72	24.44	55.11	0.814815
Tyrannosauridae	34.2	21.3	60.68	0.894737
Tyrannosauridae	34.49	25.71	66.25	0.875
Tyrannosauridae	34.69	24.51	63.57	0.977778
Tyrannosauridae	34.77	25.6	68.24	1
Tyrannosauridae	34.87	21.75	58.66	0.928571
Tyrannosauridae	35.65	23.48	61.04	0.777778
Tyrannosauridae	36.06	24	63.65	0.985915
Tyrannosauridae	36.77	28.68	81.6	1
Tyrannosauridae	37.2	27.1	60.98	1.0625
Tyrannosauridae	37.34	22.82	65.11	0.894231
Tyrannosauridae	37.54	26.05	82.14	1
Tyrannosauridae	37.65	27.74	62.01	0.9625
Tyrannosauridae	38.1	23.9	73.35	0.8
Tyrannosauridae	38.23	27.07	75	0.976471
Tyrannosauridae	38.37	24.42	77.64	1.08108
Tyrannosauridae	38.48	27.2	73.7	1.04444
Tyrannosauridae	38.56	26.2	72.55	0.795455
Tyrannosauridae	38.87	33.12	65.23	0.933333
Tyrannosauridae	38.89	31.57	85.47	0.892857
Tyrannosauridae	39.08	28.71	68.04	0.727273
Tyrannosauridae	39.1	26.46	74.66	0.888889
Tyrannosauridae	39.29	31.25	78	1
Tyrannosauridae	39.41	27.18	75.75	0.903614
Tyrannosauridae	40.01	25.31	79.7	1.16216
Tyrannosauridae	40.19	23.64	66.28	0.944444
Tyrannosauridae	40.21	27.37	78.09	1
Tyrannosauridae	40.22	28.37	82.23	1
Tyrannosauridae	40.46	28.55	76.12	0.883117
Tyrannosauridae	40.66	26.36	71.99	0.853659
Tyrannosauridae	40.76	24.51	75.03	1
Tyrannosauridae	41.3	33.5	72.95	0.8
Tyrannosauridae	41.46	30.59	103.98	0.884615
Tyrannosauridae	41.69	31.29	70.93	1.05882
Tyrannosauridae	42	30.5	71.36	0.888889
Tyrannosauridae	42.1	25.8	88.82	0.941176
Tyrannosauridae	42.1	28.9	76.02	0.941176
Tyrannosauridae	42.37	28.11	96.28	0.92
Tyrannosauridae	42.51	26.68	91.27	1.02564
Tyrannosauridae	42.86	28.35	72.67	1.00909
Tyrannosauridae	43.6	27.5	87.85	1
Tyrannosauridae	44.86	32.6	91.12	0.857143
Tyrannosauridae	45.46	32.63	94.06	0.866667
Tyrannosauridae	45.88	34.97	93.68	1.03896
Tyrannosauridae	45.89	32.17	77.74	1.14286
Tyrannosauridae	46.05	33.78	91	1.14286
Tyrannosauridae	46.11	30.97	99.03	1.02857
Tyrannosauridae	46.2	32.7	94.97	1
Tyrannosauridae	46.28	31.88	89.01	0.948052
Tyrannosauridae	46.68	36.68	108.53	1.04478
Tyrannosauridae	46.74	37.21	108.82	0.857143
Tyrannosauridae	46.93	35.35	82.01	0.9
Tyrannosauridae	47.17	32.77	117.06	0.933333
Tyrannosauridae	47.34	37.21	96.12	0.944444
Tyrannosauridae	47.6	33.9	96.94	1.07143
Tyrannosauridae	47.69	37.58	105.26	1
Tyrannosauridae	47.8	32.6	100.5	0.65
Tyrannosauridae	48.15	31.47	94.89	1.14286
Tyrannosauridae	48.46	37.48	97.52	1.06667
Tyrannosauridae	48.6	31.17	102.44	0.933333
Tyrannosauridae	48.63	33.03	115.3	0.853659
Tyrannosauridae	48.74	33.94	88.87	1.04286
Tyrannosauridae	49.49	34.82	100.89	1.07692
Tyrannosauridae	49.71	29.58	103.42	1.0375
Tyrannosauridae	50.01	33.93	104.06	1.0625
Tyrannosauridae	51.98	34.23	102.21	1.04167
Tyrannosauridae	52.07	32.67	87.42	1
Tyrannosauridae	54.5	34.4	117.1	0.8125

## Sheet: DMNH21183 in Currie&Larson2013
ID	FABL	CH	BW	PDM	ADM
DMNH21183	2.3	4.5	1.05	6	14
Dromaeosaurinae	3.57	8.16	2.44	3.8	0
Dromaeosaurinae	6.28	10.68	3.13	3	1.76
Dromaeosaurinae	7.21	12.86	4.06	3.4	2.76
Dromaeosaurinae	6.09	11.55	3.81	3	2.76
Dromaeosaurinae	4.73	9.28	3	3	2.8
Dromaeosaurinae	5.16	10.96	2.96	3.04	2.84
Dromaeosaurinae	2.04	2.12	1.06	4	3
Dromaeosaurinae	6.84	11.58	3.7	3	3
Dromaeosaurinae	6.69	10.98	3.32	3.26	3
Dromaeosaurinae	5.46	9.4	4.03	5	3
Dromaeosaurinae	6.47	11.22	3.91	3.5	3
Dromaeosaurinae	6.56	11.27	3.89	3.5	3
Dromaeosaurinae	5.2	9.5	3.1	3	3.04
Dromaeosaurinae	7.3	12.52	4.53	2.94	3.04
Dromaeosaurinae	7.64	12.38	4.02	3.5	3.16
Dromaeosaurinae	5.56	8.52	3.27	3.5	3.4
Dromaeosaurinae	7.8	12	4.2	3	3.4
Dromaeosaurinae	6	12	3.2	3.5	3.48
Dromaeosaurinae	8.75	17.33	4.07	3	3.5
Dromaeosaurinae	5.7	9.7	3.11	4.5	3.5
Dromaeosaurinae	5.7	14	3.3	3.25	3.72
Dromaeosaurinae	6.13	11.03	3.4	3.2	3.8
Dromaeosaurinae	5.4	8.8	3	3.4	3.8
Dromaeosaurinae	5.4	11	3.2	3.5	3.96
Dromaeosaurinae	3.82	4.57	2.36	3.6	4
Dromaeosaurinae	7.88	14	4.9	3.5	4
Dromaeosaurinae	5.43	9.63	2.49	4	4
Dromaeosaurinae	7.7	11.73	4.03	3.5	4
Dromaeosaurinae	7.88	16.63	4.73	3	4
Dromaeosaurinae	7.44	11.76	4.06	3.1	4.1
Dromaeosaurinae	7.53	8.23	4.23	3.8	4.3
Dromaeosaurinae	4.57	6.56	1.99	4.3	4.3
Dromaeosaurinae	6.65	11.2	3.32	3.6	4.3
Dromaeosaurinae	6.56	9.92	3.2	3.5	4.3
Dromaeosaurinae	7.39	8.88	3.44	4	4.4
Dromaeosaurinae	6.56	9.98	2.82	3.8	4.5
Dromaeosaurinae	4.81	11.2	4.03	5	4.9
Dromaeosaurinae	6.3	9.1	2.8	4	5
Dromaeosaurinae	8.58	15.93	5.06	4	5
Dromaeosaurinae	5.6	9.5	3	3.7	5
Dromaeosaurinae	5.95	9.63	3.15	3.3	5
Dromaeosaurinae	5.81	6.39	3.04	4	5.5
Dromaeosaurinae	4.32	4.9	2.36	4.6	5.5
Dromaeosaurinae	7.53	9.98	3.84	3.5	6
Dromaeosaurinae	4.32	5.23	2.4	5	6
Dromaeosaurinae	2.74	5.73	2	4.25	6
Dromaeosaurinae	3.74	5.06	1.56	4.5	6.5
Dromaeosaurinae	5.43	8.58	3.08	4	7
Dromaeosaurinae	4.9	7.39	1.96	5	7
Dromaeosaurinae	5.31	5.64	2.44	4.3	7
Dromaeosaurinae	3.4	6.97	1.78	5	7
Dromaeosaurinae	3.97	4.44	2.15	5.1	7
Dromaeosaurinae	3.32	5.31	1.8	4.5	7
Dromaeosaurinae	3.49	4.73	1.6	4.5	7.4
Dromaeosaurinae	3.74	4.07	1.52	4.5	7.5
Dromaeosaurinae	2.3	3.4	1.2	5	8
Dromaeosaurinae	3.82	4.15	1.86	4	8.8
Dromaeosaurinae	4.32	7.06	1.88	4.6	9.4
Dromaeosaurinae	5.48	11.55	3.4	4.1	0
Dromaeosaurinae	2.16	4.9	1.52	4.4	0
Dromaeosaurinae	4.15	4.73	1.88	5	0
Dromaeosaurinae	3.32	6.64	1.62	5	0
Dromaeosaurinae	4.73	8.05	3	5	0
Dromaeosaurinae	8.75	11.38	6.56	4.6	0
Dromaeosaurinae	3.07	5.31	1.7	5.1	0
Dromaeosaurinae	2.66	4.98	2.32	4.6	0
Dromaeosaurinae	2.66	3.82	2.2	4.1	0
Dromaeosaurinae	3.9	8.5	2.3	4	0
Dromaeosaurinae	4.5	11.5	2.9	3.26	0
Dromaeosaurinae	4.7	11	2.8	3.5	0
Dromaeosaurinae	5.9	10.5	3.9	4	0
Dromaeosaurinae	5.3	14.5	4.2	3.5	0
Dromaeosaurinae	5.7	9.5	3.9	3.5	0
Dromaeosaurinae	3.6	6.4	2.3	5	0
Dromaeosaurinae	4.1	9	2.8	4	0
Dromaeosaurinae	4.3	9.8	2.7	3	0
Dromaeosaurinae	4.9	8.5	2.7	3.5	0
Dromaeosaurinae	5	10	3.2	3	0
Dromaeosaurinae	5	11.4	3.5	3.5	0
Dromaeosaurinae	5.1	10.8	3.1	3.25	0
Dromaeosaurinae	5.4	10.5	2.9	3.5	0
Dromaeosaurinae	5.5	11.5	3.7	3.5	0
Dromaeosaurinae	5.5	12.3	3.7	4	0
Dromaeosaurinae	6.2	14	3.5	4	0
Dromaeosaurinae	6.1	13	3.9	3.5	0
Dromaeosaurinae	7.1	13.5	4	3.5	0
Dromaeosaurinae	7	13.5	4.5	3	0
Dromaeosaurinae	6.4	11	4	3.25	0
Dromaeosaurinae	7.8	13.2	4.1	3	0
Dromaeosaurinae	6	14.5	3.5	4.5	0
Dromaeosaurinae	6	13.5	3.7	3.25	0
Dromaeosaurinae	7.9	17.2	5.1	3.5	0
Dromaeosaurinae	7.9	14.5	4	3.25	0
Dromaeosaurinae	6.1	13	3.7	3	0
Dromaeosaurinae	5.4	16.5	4	3	0
Dromaeosaurinae	6.5	13.5	3.7	3.5	0
Dromaeosaurinae	6.5	13	4	3.75	0
Dromaeosaurinae	7.2	15.5	3.9	3.75	0
Dromaeosaurinae	7.1	15.5	4.3	3	0
Dromaeosaurinae	6.4	12.5	4.3	3.75	0
Dromaeosaurinae	5.6	12	3.9	3	0
Dromaeosaurinae	6.3	10.5	3.6	3	0
Dromaeosaurinae	6.1	10.5	3.3	5	0
Dromaeosaurinae	6.3	13.5	3.9	3.25	0
Dromaeosaurinae	6.8	13	3.3	3.75	0
Dromaeosaurinae	4.2	8.8	2.7	3	0
Dromaeosaurinae	5.5	13	3.9	3	0
Dromaeosaurinae	4	10.5	3	3	0
Dromaeosaurinae	3.5	7.8	2.7	3.5	0
Dromaeosaurinae	5	11	4.1	3.25	0
Dromaeosaurinae	4.9	11	3.5	4	0
Dromaeosaurinae	3.8	6.5	2	4.5	0
Dromaeosaurinae	5.5	12	3.4	3.25	0
Dromaeosaurinae	4.9	9.8	2.5	3.25	0
Dromaeosaurinae	3.8	8	2.8	3.5	0
Dromaeosaurinae	4.1	10	2.5	3.5	0
Dromaeosaurinae	5.8	10.7	3.9	3	0
Dromaeosaurinae	3.8	9.2	2.9	3	0
Dromaeosaurinae	5.1	11	4.2	3.5	0
Dromaeosaurinae	4.3	10.5	3.1	3.5	0
Dromaeosaurinae	3	7.3	2.1	4	0
Dromaeosaurinae	6	13	4.6	3	0
Dromaeosaurinae	5.04	9.04	3.12	5.02	0
Dromaeosaurinae	6.48	9.63	2.91	4	0
Dromaeosaurinae	2.44	4.73	2.04	4	0
Dromaeosaurinae	4.07	7.06	1.64	4.3	0
Dromaeosaurinae	4.9	8.22	2.4	4.1	0
Dromaeosaurinae	2.91	5.64	2.16	4.1	0
Dromaeosaurinae	2.74	5.31	2.28	4.7	0
Dromaeosaurinae	2.08	4.81	1.96	4.86	0
Dromaeosaurinae	2.24	4.98	1.74	5.2	0
Dromaeosaurinae	2.82	5.81	2.16	4.3	0
Dromaeosaurinae	2.99	5.23	2.28	4.8	0
Dromaeosaurinae	2.32	4.23	1.58	4.9	0
Dromaeosaurinae	6.5	12	3	3.03	0
Dromaeosaurinae	6.1	10	2.4	3.25	0
Dromaeosaurinae	6.3	11	3.2	3.5	0
Dromaeosaurinae	5.7	12.5	2.5	3.5	0
Dromaeosaurinae	5.8	13	2.5	3.5	0
Dromaeosaurinae	7.2	15	3.2	3	0
Dromaeosaurinae	5.4	10.5	2.5	3.5	0
Dromaeosaurinae	6.5	13	3	3.25	0
Dromaeosaurinae	7.9	14	3.1	3.25	0
Dromaeosaurinae	6.6	15.5	3	3.25	0
Dromaeosaurinae	6.4	11.5	3.1	3.25	0
Dromaeosaurinae	5.8	11	2.5	3.75	0
Dromaeosaurinae	6.3	12	3.4	3.5	0
Dromaeosaurinae	6.3	15.5	3	3	0
Dromaeosaurinae	6	12.5	3	3.25	0
Dromaeosaurinae	6.4	12	3	3	0
Dromaeosaurinae	6.3	11.2	2.4	3.5	0
Dromaeosaurinae	6.4	11.7	3	3.25	0
Dromaeosaurinae	7	12	3	3	0
Dromaeosaurinae	6.8	13.7	3.3	3	0
Dromaeosaurinae	5.3	9.3	2.1	3.25	0
Dromaeosaurinae	5.8	11.5	2.6	3.5	0
Dromaeosaurinae	5	11	2.3	3.5	0
Dromaeosaurinae	6.4	14	2.5	3	0
Richardoestesia	2.68	3.3	1.36	8.2	0
Richardoestesia	3.49	4.42	1.62	7	0
Richardoestesia	3.32	5.58	1.8	6.4	0
Richardoestesia	1.82	2.21	0.71	7.7	0
Richardoestesia	3.68	6.63	2	6.6	0
Richardoestesia	4.399	7.553	2.24	4.6	0
Richardoestesia	2.82	4.23	1.08	7.6	0
Richardoestesia	4.81	13.13	2.32	5.76	6
Richardoestesia	3.62	5.78	1.42	6.7	6.2
Richardoestesia	6.97	11.9	2.66	5	6.2
Richardoestesia	2.4	2.8	0.81	6.8	6.4
Richardoestesia	3.32	5.48	1.74	5.5	6.4
Richardoestesia	3.15	3.9	1.48	6.6	6.5
Richardoestesia	3.57	10.68	1.82	7	6.5
Richardoestesia	2.49	4.57	2.04	5.3	6.6
Richardoestesia	2.52	4.15	1.3	6	7
Richardoestesia	2.57	3.28	1.06	6	7
Richardoestesia	5.4	14.88	2.96	6.5	7
Richardoestesia	3.85	13.63	2.04	6.36	7.04
Richardoestesia	4.31	14.37	2.11	6.28	7.08
Richardoestesia	2.41	2.99	1.08	7.1	7.2
Richardoestesia	4.65	11.03	2.2	7	7.25
Richardoestesia	3.57	7.14	1.84	7	7.25
Richardoestesia	2.52	3.36	0.96	7.2	7.3
Richardoestesia	2.74	3.82	1.12	5.8	7.3
Richardoestesia	4.23	10.5	2.24	6.26	7.3
Richardoestesia	2.44	2.8	1	6.4	7.4
Richardoestesia	3.66	5.39	1.45	5.58	7.44
Richardoestesia	3.73	4.81	1.39	6.26	7.44
Richardoestesia	3.32	4.23	1.3	5.9	7.5
Richardoestesia	2.82	3.9	1.28	6.2	7.5
Richardoestesia	5.74	16.65	2.53	6.3	7.56
Richardoestesia	2.44	3.04	1.14	6.3	7.6
Richardoestesia	4.35	13.5	2.21	6.32	7.62
Richardoestesia	3.41	4.92	1.3	6.62	7.66
Richardoestesia	2.28	2.46	0.8	9	7.7
Richardoestesia	2.74	7.14	1.28	7	7.7
Richardoestesia	3.15	7.47	1.46	7	7.7
Richardoestesia	3.9	9.89	2.08	9.2	7.7
Richardoestesia	4.74	15.1	2.29	6.72	7.7
Richardoestesia	3.79	5.38	1.3	5.76	7.72
Richardoestesia	5.89	15.58	3	6.5	7.75
Richardoestesia	3.97	6.17	1.81	5.06	7.78
Richardoestesia	2.08	2.68	0.96	6.3	7.8
Richardoestesia	6.225	11.68	2.6	6.1	7.8
Richardoestesia	5.55	17.2	2.39	6.02	7.94
Richardoestesia	4.4	13.86	2.09	7.34	7.96
Richardoestesia	4.75	12.36	2.18	7.08	7.98
Richardoestesia	2.24	2.88	0.98	6.5	8
Richardoestesia	2.57	3.82	1.22	6.7	8
Richardoestesia	2.24	3.98	1.2	5.5	8
Richardoestesia	2.2	2.48	1	7.9	8
Richardoestesia	2.24	3.49	0.96	6.5	8
Richardoestesia	3.74	4.98	2.2	6.25	8
Richardoestesia	2.6	3.5	0.9	7	8
Richardoestesia	3.65	4.15	1.78	6.3	8
Richardoestesia	4.57	11.38	2.2	7	8
Richardoestesia	3.98	11.73	2.44	7	8
Richardoestesia	4.48	13.3	2.2	7	8
Richardoestesia	2.57	4.81	1.32	8	8
Richardoestesia	3.98	4.48	2.16	6.3	8
Richardoestesia	2.82	3.53	1.16	6	8.1
Richardoestesia	3.65	5.81	1.66	7	8.1
Richardoestesia	3.65	7.3	1.78	6.2	8.2
Richardoestesia	2.41	3.82	1	6.5	8.2
Richardoestesia	4.98	6.557	2.2	5.6	8.2
Richardoestesia	2.48	3.4	1.2	7	8.3
Richardoestesia	2.52	3.12	0.97	7.1	8.3
Richardoestesia	4.98	16.38	2.26	6.76	8.3
Richardoestesia	1.92	2.44	0.8	8.7	8.4
Richardoestesia	4.32	6.56	1.24	6.5	8.5
Richardoestesia	2.28	3	0.96	6.2	8.5
Richardoestesia	3.8	4.15	2.24	7	8.5
Richardoestesia	3.4	8.75	1.82	6.5	8.5
Richardoestesia	2.988	3.901	1.2	6.3	8.6
Richardoestesia	3.49	9.45	1.92	6.3	8.6
Richardoestesia	1.88	2.32	0.84	8.2	8.7
Richardoestesia	5.28	10.24	2.48	5.9	8.7
Richardoestesia	4.02	13.71	2.12	6.46	8.74
Richardoestesia	2.87	3.35	1.21	7.3	8.78
Richardoestesia	2.16	2.57	0.92	6.4	8.8
Richardoestesia	3.65	6.1	1.44	6	8.8
Richardoestesia	2.91	3.78	1.06	6.8	8.8
Richardoestesia	2	2.28	0.94	7.4	8.8
Richardoestesia	3.57	9.8	1.8	7.7	8.8
Richardoestesia	3.68	5.5	1.69	5.26	8.96
Richardoestesia	2.48	3.28	1.08	7	9
Richardoestesia	2.82	4.73	1.2	6.4	9
Richardoestesia	2.91	4.07	1.24	6.9	9
Richardoestesia	2.68	3.44	1.36	9	9
Richardoestesia	2.8	3.6	1	7.5	9
Richardoestesia	3.74	5.4	1.94	6.7	9
Richardoestesia	2.76	3.4	1.14	7.2	9
Richardoestesia	1.92	2.2	0.8	6.8	9
Richardoestesia	2.4	5.11	1.12	7.5	9
Richardoestesia	3.82	7.72	1.58	6	9
Richardoestesia	5.31	13.21	2.68	6.5	9
Richardoestesia	1.99	3.98	0.96	8.5	9
Richardoestesia	3.57	4.73	1.92	6.7	9.1
Richardoestesia	2.41	3.61	1.16	6.5	9.2
Richardoestesia	2.05	2.38	0.75	7.6	9.2
Richardoestesia	3.61	6.37	1.55	6.26	9.2
Richardoestesia	2.04	2.44	0.9	8	9.2
Richardoestesia	4.24	9.46	1.96	6.2	9.3
Richardoestesia	3.75	6.97	1.53	5.7	9.36
Richardoestesia	3.5	6.3	1.53	6.42	9.38
Richardoestesia	3.59	5.96		6.08	9.38
Richardoestesia	2.28	3.12	1	7.7	9.4
Richardoestesia	3.15	5.23	1.92	7	9.4
Richardoestesia	1.91	2.91	1.06	6.5	9.5
Richardoestesia	2.31	2.79	1.15	8.2	9.5
Richardoestesia	2.24	3.74	0.94	9	9.5
Richardoestesia	2.6	2.68	0.86	8.1	9.6
Richardoestesia	1.91	3.49	0.86	6.7	9.6
Richardoestesia	3.07	8.93	1.74	8.3	9.6
Richardoestesia	2.36	2.68	0.92	7	9.8
Richardoestesia	3.57	9.28	1.96	7.4	9.8
Richardoestesia	3.58	5.23	1.21	6.12	9.84
Richardoestesia	2.04	2.52	0.92	6.5	10
Richardoestesia	1.8	2.88	0.82	7	10
Richardoestesia	2.91	4.15	1.42	7.7	10
Richardoestesia	2.16	3.52	0.9	6.5	10
Richardoestesia	2.4	3.1	1.1	9	10
Richardoestesia	3.5	5.2	1.4	6	10
Richardoestesia	2.66	3.9	1.1	6.6	10
Richardoestesia	2	2.8	0.84	7.4	10
Richardoestesia	2.99	4.65	1.25	6.3	10
Richardoestesia	2.82	7.14	1.34	7.6	10
Richardoestesia	2.74	4.32	1.22	7.5	10.2
Richardoestesia	3.82	5.69	1.34	6.1	10.2
Richardoestesia	2.91	6.14	1.54	8.2	10.3
Richardoestesia	2.16	3.98	1.04	6.7	10.4
Richardoestesia	3.4	4.98	1.42	6.2	10.4
Richardoestesia	2.08	2.68	1.16	9	10.5
Richardoestesia	3.4	4.32	1.33	6.5	10.5
Richardoestesia	2.24	2.99	1	7.6	10.6
Richardoestesia	1.6	2.6	0.84	10.3	10.6
Richardoestesia	2.8	9.63	1.62	10	10.75
Richardoestesia	3.65	5.4	1.2	5.7	10.8
Richardoestesia	2.41	2.95	0.88	6.8	10.8
Richardoestesia	1.88	2.16	0.9	8	10.8
Richardoestesia	2.47	6.18	1.39		10.9
Richardoestesia	3.32	7.8	1.7	8	11
Richardoestesia	3.2	9.45	1.84	8	11
Richardoestesia	1.6	3.36	0.9	10	11.2
Richardoestesia	2.41	3.82	1.08	7.7	11.3
Richardoestesia	3.1	8.27	1.62	8.1	11.3
Richardoestesia	2.4	3.24	0.94	10	11.4
Richardoestesia	1.92	3.04	0.81	9.4	12
Richardoestesia	2	2.12	0.78	9	12
Richardoestesia	3.15	4.69	1.56	8.5	12
Richardoestesia	2.57	5.64	1.56	8.9	12
Richardoestesia	2.41	3.98	1.08	9.4	12
Richardoestesia	1.92	4	1	9.5	12.5
Richardoestesia	2.57	6.14	1.66	8	12.5
Richardoestesia	4.55	14	2.36	6.2	13
Richardoestesia	2.64	6.75	1.43	11.54	13.36
Richardoestesia	2.32	3.4	1.28	5.4	0
Richardoestesia	4.15	5.81	1.64	6.5	0
Richardoestesia	3.49	5.56	1.88	5.6	0
Richardoestesia	1.88	3.04	0.95	9	0
Richardoestesia	2.48	2.8	1.04	10	0
Richardoestesia	1.88	2.12	0.88	7	0
Richardoestesia	1.6	2.96	0.98	9	0
Richardoestesia	2.12	2.52	0.94	7	0
Richardoestesia	1.92	2.92	1	11	0
Richardoestesia	2.2	2.56	0.8	8.5	0
Richardoestesia	2.82	5.06	1.48	8	0
Richardoestesia	2.4	3.24	1.1	9	0
Richardoestesia	2.12	3.2	1.08	6.5	0
Richardoestesia	3.98	4.73	2.02	7	0
Richardoestesia	1.32	1.76	0.62	9	0
Richardoestesia	1.76	2.76	0.78	10.3	0
Richardoestesia	3.07	4.57	1.54	6.26	0
Richardoestesia	2.52	3.82	1.36	9	0
Richardoestesia	2	2.96	1.02	7.6	0
Richardoestesia	2.36	3.16	1.06	6.5	0
Richardoestesia	2.8	4.9	1.74	7.2	0
Richardoestesia	2.44	2.8	0.94	6.6	0
Richardoestesia	2.16	4.07	1.48	5.8	0
Richardoestesia	3.15	4.32	1.84	7.5	0
Richardoestesia	3.24	4.65	1.72	7.5	0
Richardoestesia	1.96	2.96	0.82	10.1	0
Richardoestesia	3.32	6.39	1.88	7.76	0
Richardoestesia	3.15	5.56	1.84	7.2	0
Richardoestesia	2.56	3.44	1.22	7.7	0
Richardoestesia	1.68	2.4	1	6.3	0
Richardoestesia	2.2	3	1.04	6.7	0
Richardoestesia	2.53	3.74	0.92	7.5	0
Richardoestesia	2.52	3	1.12	8.2	0
Richardoestesia	1.83	3.49	0.9	6.7	0
Richardoestesia	3.57	6.31	1.84	5.7	0
Richardoestesia	4.07	6.56	2.28	6.3	0
Richardoestesia	2.16	3.9	1.16	7.4	0
Richardoestesia	2.08	2.64	0.9	9.2	0
Richardoestesia	2.16	3	0.86	8	0
Richardoestesia	2.48	3.04	0.92	9.8	0
Richardoestesia	2.04	2.9	0.7	9	0
Richardoestesia	1.96	2.8	0.98	11.2	0
Richardoestesia	2.6	2.88	1.06	9	0
Richardoestesia	1.68	1.88	1.04	8.8	0
Richardoestesia	1.76	2.08	0.98	8.3	0
Richardoestesia	1.68	2.1	0.82	10.2	0
Richardoestesia	2.41	3.98	1.26	5.5	0
Richardoestesia	2.24	4.48	1.44	5.9	0
Richardoestesia	1.8	2.12	0.96	8.5	0
Richardoestesia	3.65	5.73	1.36	6.4	0
Richardoestesia	2.32	2.76	1.2	8.7	0
Richardoestesia	2.24	3.15	0.96	7.8	0
Richardoestesia	3.4	4.48	1.6	8.1	0
Richardoestesia	3.2	4.73	1.56	7.6	0
Richardoestesia	3.07	4.19	1.5	7.3	0
Richardoestesia	2.74	3.9	1.24	5.7	0
Richardoestesia	3.4	3.74	1.6	7.9	0
Richardoestesia	3.15	3.65	1.18	7.1	0
Richardoestesia	2.74	3.4	1.18	6.5	0
Richardoestesia	2	2.38	0.92	8	0
Richardoestesia	3.15	3.98	1.66	8	0
Richardoestesia	1.9	2.1	1.1	8	0
Richardoestesia	2.4	3	1	9	0
Richardoestesia	2.4	4.2	1.4	9.5	0
Richardoestesia	2.4	3.3	1.1	10	0
Richardoestesia	2.49	3.65	1.45	6.6	0
Richardoestesia	2.91	5.06	1.44	5.6	0
Richardoestesia	3.24	4.9	1.48	8	0
Richardoestesia	3.4	4.48	1.52	6.8	0
Richardoestesia	3.2	5.4	1.7	5.5	0
Richardoestesia	2.82	4.32	1.38	8	0
Richardoestesia	2.86	4.98	1.46	7	0
Richardoestesia	2.66	4.9	1.44	8	0
Richardoestesia	3.65	4.07	1.7	8	0
Richardoestesia	3.15	3.98	1.54	8	0
Richardoestesia	2.99	4.48	1.52	7.3	0
Richardoestesia	3.24	5.48	1.68	7.5	0
Richardoestesia	2.74	3.24	1.26	8.6	0
Richardoestesia	2.49	4.36	1.4	8.5	0
Richardoestesia	2.91	4.9	1.76	7.5	0
Richardoestesia	2.49	3.65	1.18	7.76	0
Richardoestesia	2.32	3.12	0.88	8.3	0
Richardoestesia	2.08	2.7	0.96	8	0
Richardoestesia	1.96	3.24	0.94	8	0
Richardoestesia	2.91	4.81	2.2	6.8	0
Richardoestesia	3.82	4.98	1.76	6.5	0
Richardoestesia	2.99	4.73	1.58	7.2	0
Richardoestesia	5.64	5.06	1.62	8	0
Richardoestesia	2.95	4.32	1.46	7.3	0
Richardoestesia	2.82	3.4	1.32	6.3	0
Richardoestesia	3.15	4.07	1.34	7.2	0
Richardoestesia	2.82	3.15	1.06	6.8	0
Richardoestesia	2.08	3.28	1.46	9	0
Richardoestesia	2.32	3.28	0.98	7.8	0
Richardoestesia	2	2.68	0.96	7.3	0
Richardoestesia	2.32	3.04	0.86	7.5	0
Richardoestesia	2.44	2.72	0.94	6.5	0
Richardoestesia	1.84	2.86	0.7	6.5	0
Richardoestesia	2.82	4.32	1.56	8	0
Richardoestesia	2.57	3.4	1.36	8.5	0
Richardoestesia	2.64	3	1.08	8.5	0
Richardoestesia	1.36	2	0.72	14.6	0
Richardoestesia	2.24	4.15	1.34	5.5	0
Richardoestesia	2.24	3.9	1.56	5.5	0
Richardoestesia	3.45	4.32	1.56	6	0
Richardoestesia	3.32	3.74	1.18	6.8	0
Richardoestesia	3.15	3.74	1.16	7	0
Richardoestesia	2.32	3.32	1.14	7.8	0
Richardoestesia	2.91	3.03	1.36	10.5	0
Richardoestesia	2.49	4.48	1.26	5.6	0
Richardoestesia	1.99	2.99	0.92	8.3	0
Richardoestesia	2.24	3.4	0.82	8	0
Richardoestesia	2.4	5.06	1.22	5.8	0
Richardoestesia	2.44	3.24	1.12	10.5	0
Richardoestesia	2.56	2.88	1	7	0
Richardoestesia	2.64	3.88	1.32	8	0
Richardoestesia	2.4	3.6	1.2	8	0
Richardoestesia	2.4	2.92	1.1	9	0
Richardoestesia	4.07	10.5	2.68	6	0
Richardoestesia	2.4	3.2	0.98	8	0
Richardoestesia	4.48	5.89	2.24	7	0
Richardoestesia	3.56	3.98	1.72	7	0
Richardoestesia	3.4	3.65	1.74	7	0
Richardoestesia	2.44	2.76	1.12	8	0
Richardoestesia	3.68	8.93	2.52	6.4	0
Richardoestesia	2.91	4.57	1.48	11	0
Richardoestesia	3.07	4.15	1.46	7.5	0
Richardoestesia	3.03	6.89	1.42	6.3	0
Richardoestesia	2	3.48	1.04	10.2	0
Richardoestesia	1.48	3.12	0.96	10.2	0
Richardoestesia	3.74	6.81	1.82	6.5	0
Richardoestesia	2.32	4.65	1.36	5.8	0
Richardoestesia	2.99	4.81	1.7	6	0
Richardoestesia	2.8	4.5	1.2	8	0
Richardoestesia	2.2	4	1.6	8	0
Richardoestesia	1.6	3.2	0.9	10	0
Richardoestesia	2.49	4.48	1.46	5.9	0
Richardoestesia	3.3	5.8	1.4	8	0
Richardoestesia	1.64	2.68	0.9	8	0
Richardoestesia	2.41	4.32	1.36	9	0
Richardoestesia	2.24	5.23	1.26	8	0
Richardoestesia	1.72	3.2	1.36	7.3	0
Richardoestesia	2.4	3.72	1.84	10	0
Richardoestesia	2.36	2.8	1.18	6	0
Richardoestesia	2.2	5.1	1.7	11	0
Richardoestesia	3.15	5.15	1.56	5.4	0
Richardoestesia	2.99	5.15	2.32	7.5	0
Richardoestesia	1.83	3.15	1.3	7.5	0
Richardoestesia	2.91	4.81	1.42	6	0
Richardoestesia	1.9	3.4	0.9	8	0
Richardoestesia	2.3	4.2	1	8	0
Richardoestesia	3.9	7.5	3	6	0
Richardoestesia	1.8	3.1	0.7	7	0
Richardoestesia	4.7	12.3	2.3	5.26	0
Richardoestesia	3.7	8.3	1.6	7	0
Richardoestesia	3.5	5.5	1.5	7	0
Richardoestesia	4	10	1.7	7	0
Richardoestesia	2.9	5.3	1	7	0
Richardoestesia	2.8	5.2	0.9	7	0
Richardoestesia	1.7	4	0.7	9.5	0
Richardoestesia	1.4	2.8	0.7	11	0
Richardoestesia	3.14	6.13	1.5	7.04	0
Richardoestesia	2.21	4.8	1.16	9.26	0
Richardoestesia	2	5.35	0.99	9.46	0
Richardoestesia	2.83	4.43	1.08	7.82	0
Richardoestesia	2.11	3.75	1.16	7.36	0
Richardoestesia	3.8	10	2	7	0
Richardoestesia	3.85	8.93	2.24	7.5	0
Richardoestesia	3.85	5.35	1.56	6.58	0
Richardoestesia	2.94	4.86	1.14	7.66	0
Richardoestesia	3.36	5.45	1.34	7.28	0
Richardoestesia	3.89	7	1.58	5.72	0
Richardoestesia	2.36	5.15	1.2	7.5	0
Richardoestesia	2.91	6.64	1.48	10	0
Richardoestesia	5.78	14	2.8	6.5	0
Richardoestesia	1.96	4.57	1.12	9	0
Richardoestesia	2	3.4	1	10.5	0
Richardoestesia	2.91	5.98	1.38	11	0
Richardoestesia	1.99	4.4	0.96	10.5	0
Richardoestesia	3.24	5.4	1.4	8.4	0
Richardoestesia	1.56	2.72	0.8	14	0
Richardoestesia	1.83	4.07	0.78	11.5	0
Richardoestesia	2.32	3.65	1.1	10.2	0
Richardoestesia	2.82	6.39	1.04	7.7	0
Richardoestesia	3.7	9.5	2	8	0
Richardoestesia	3.9	9.2	1.9		0
Richardoestesia	2.12	5.56	1.34	9	0
Richardoestesia	1.72	2.72	0.94	13	0
Richardoestesia	2.66	7.06	1.6		0
Richardoestesia	2.68	2.68	0.98	8	0
Richardoestesia	3.24	7.3	1.2	7.5	0
Richardoestesia	2.44	3	1.04	10	0
Richardoestesia	2.04	2.94	0.78	8.2	0
Richardoestesia	3.08	7.14	1.76	8.26	0
Richardoestesia	2.64	7.06	1.28	7.76	0
Richardoestesia	1.79	4.4	1.04	8.7	0
Richardoestesia	1.79	4.4	0.94	9	0
Richardoestesia	2.95	6.56	1.74	7.3	0
Richardoestesia	2.16	3.6	0.98	8	0
Richardoestesia	1.92	3.28	0.9	10.7	0
Richardoestesia	2.4	3	1	11.3	0
Richardoestesia	1.88	5.01	1.12	10.8	0
Richardoestesia	2.5	5.53	1.35	11	0
Richardoestesia	3.5	7.5	1.5	6.5	0
Richardoestesia	2.8	6.8	1.3	8	0
Richardoestesia	3.2	8.5	1.2	10	0
Richardoestesia	1.9	5.2	0.9	12	0
Richardoestesia	1.7	4.2	0.9	0	0
Richardoestesia	2.5	5	1.3	8	0
Richardoestesia	3.6	12.5	1.7	6	0
Richardoestesia	3.9	5.4	2.5	7.5	0
Richardoestesia	1.9	3	0.7	12	0
Richardoestesia	1.9	2.9	0.7	12	0
Richardoestesia	4.5	11	2.1	6	0
Richardoestesia	2.3	5.8	1.1	8.5	0
Richardoestesia	2.1	4.5	1.1	8	0
Richardoestesia	2.3	5.5	1.2	10	0
Richardoestesia	3.7	9.5	1.7	7	0
Richardoestesia	3	7.2	1.6	7	0
Richardoestesia	3.1	9.7	1.5	7	0
Richardoestesia	2.4	3.3	0.8	10	0
Richardoestesia	2	2.7	0.7	12	0
Richardoestesia	2	3.7	1	12	0
Richardoestesia	1.8	2.3	0.7	12	0
Richardoestesia	2.2	3.3	0.8	12	0
Richardoestesia	1.4	2.4	0.6	12	0
Richardoestesia	1.9	2.5	0.7	12	0
Richardoestesia	3.1	6	1.8	4.4	0
Richardoestesia	2	2.5	0.9	10	0
Richardoestesia	1.7	3	0.7	11	0
Richardoestesia	1.7	3.5	1	10	0
Richardoestesia	1.8	2.3	0.9	9	0
Richardoestesia	2	4	1	12	0
Richardoestesia	4.4	8.6	1.8	6.5	0
Richardoestesia	3.8	7.3	1.8	6.5	0
Richardoestesia	2.5	5.2	1.8	8.5	0
Richardoestesia	2.5	5.4	1.4	8.5	0
Richardoestesia	2.7	3.9	1.2	9	0
Richardoestesia	2.7	5	1.4	12	0
Richardoestesia	2.9	5.4	1.4	10	0
Richardoestesia	3.5	7.2	1.5	8	0
Richardoestesia	3.2	6.3	1.4	8	0
Richardoestesia	2.2	4	1	9	0
Richardoestesia	2.8	6.5	1.6	6.5	0
Richardoestesia	3.2	7.3	1.6	8	0
Richardoestesia	3.46	11.26	1.83	7.64	0
Richardoestesia	3.3	6.7	1.7	10.5	0
Richardoestesia	2.7	5.3	1.4	8	0
Richardoestesia	3.3	9.1	1.8	8	0
Richardoestesia	3.2	6.2	1.5	6.5	0
Richardoestesia	3	4.8	1.5	8	0
Richardoestesia	2.3	4.4	1.4	8	0
Richardoestesia	4.2	13	1.8	8	0
Richardoestesia	3.8	8.9	1.7	7.5	0
Richardoestesia	3.9	9.1	1.8	7.5	0
Richardoestesia	4.1	8.5	2	8	0
Richardoestesia	4.4	8.9	2	7	0
Richardoestesia	2.9	5.8	1.4	10	0
Richardoestesia	3.5	8.6	1.8	5.5	0
Richardoestesia	2.9	5.9	1.5	10	0
Richardoestesia	2.7	5.9	1.4	9	0
Richardoestesia	3.9	7.3	1.5	10	0
Richardoestesia	4.4	9.2	2	6.5	0
Richardoestesia	2.7	5.2	1.4	6.5	0
Saurornitholestinae	2.4	2.68	1.18	5.7	0
Saurornitholestinae	3.57	6.06	1.86	5.5	0
Saurornitholestinae	3.9	5.81	1.68	4.75	0
Saurornitholestinae	2.36	3.16	1.06	7	0
Saurornitholestinae	2.16	3.57	1.14	6.2	0
Saurornitholestinae	2.91	3.82	1.32	5.6	0
Saurornitholestinae	2.16	4.23	1.02	6.6	0
Saurornitholestinae	2.49	4.77	1.26	6	0
Saurornitholestinae	3.9	7.22	1.6	5.2	0
Saurornitholestinae	2.57	4.65	1.48	6.3	0
Saurornitholestinae	4.73	7.22	2.56	3.7	0
Saurornitholestinae	5	10	3.5	2.3	2.7
Saurornitholestinae	5.23	9.36	2.76	2.8	2.9
Saurornitholestinae	4.98	7.68	2.48	2.8	3.1
Saurornitholestinae	5.5	12	3.5	3	3.5
Saurornitholestinae	4.9	10.15	2.41	3.1	4.5
Saurornitholestinae	4.23	6.56	2.16	4	4.6
Saurornitholestinae	4.75	7.58	2.38	4.3	4.88
Saurornitholestinae	5.2	7.5	2.8	4	5
Saurornitholestinae	5.81	9.12	2.88	3.2	5
Saurornitholestinae	5.06	9.6	2.56	3.4	5
Saurornitholestinae	3.24	5.06	1.72	3	5
Saurornitholestinae	6.32	9.28	2.74	3.82	5.02
Saurornitholestinae	4.73	7.55	2.4	3.5	5.1
Saurornitholestinae	5.6	8	2.6	3.3	5.1
Saurornitholestinae	6.13	9.7	2.54	4.34	5.1
Saurornitholestinae	5.26	10.78	2.37	3.78	5.18
Saurornitholestinae	3.98	6.64	2.12	4.3	5.2
Saurornitholestinae	4.4	6.39	2.04	4.5	5.2
Saurornitholestinae	5.15	8.38	2.4	3.2	5.2
Saurornitholestinae	3.15	4.07	1.58	3	5.2
Saurornitholestinae	4.48	7.3	2.32	3.5	5.2
Saurornitholestinae	5.48	9.52	2.56	3.5	5.4
Saurornitholestinae	3.9	5.81	2.08	4	5.4
Saurornitholestinae	6.81	13.89	2.72	4.16	5.44
Saurornitholestinae	3.15	3.32	1.36	4.7	5.5
Saurornitholestinae	4.89	8.74	2.45	3.82	5.5
Saurornitholestinae	5.2	7.1	2.3	4.6	5.6
Saurornitholestinae	4.07	6.39	1.99	3.5	5.7
Saurornitholestinae	6.7	8.48	2.83	4.28	5.74
Saurornitholestinae	4.65	6.64	2.36	3.05	5.8
Saurornitholestinae	7.12	10.8	3.5	3.52	5.82
Saurornitholestinae	5.98	11.66	2.48	4.58	5.84
Saurornitholestinae	5.08	9	2.14	3.9	5.98
Saurornitholestinae	5.6	8.55	2.42	4.5	5.98
Saurornitholestinae	4.65	6.97	1.94	4.3	6
Saurornitholestinae	5.1	9	2.3	4	6
Saurornitholestinae	5.12	8.18	2.37	4.06	6.1
Saurornitholestinae	6.53	9.66	3.73	3.58	6.1
Saurornitholestinae	1.69	2.2	0.83	5.42	6.12
Saurornitholestinae	5.28	9.08	2.13	5.06	6.14
Saurornitholestinae	5.42	9.21	2.37	4.2	6.18
Saurornitholestinae	3.82	6.14	1.48	4.9	6.2
Saurornitholestinae	3.4	4.48	1.36	4.8	6.2
Saurornitholestinae	4.07	8.13	1.72	4.8	6.2
Saurornitholestinae	4.96	7.89	2.48	5.26	6.2
Saurornitholestinae	4.32	6.47	1.66	4.5	6.3
Saurornitholestinae	4.4	6.14	1.92	5	6.3
Saurornitholestinae	5.1	9	2.2	4.2	6.4
Saurornitholestinae	4.07	7.22	1.62	5	6.5
Saurornitholestinae	4.15	7.3	1.76	4.8	6.5
Saurornitholestinae	4.32	5.81	1.9	4.4	6.5
Saurornitholestinae	4.07	6.14	1.7	5	6.5
Saurornitholestinae	3.3	4.3	1.4	4.5	6.5
Saurornitholestinae	4.2	8.5	2.3	4	6.5
Saurornitholestinae	2.84	3.32	1.42	5	6.6
Saurornitholestinae	3.11	4.48	1.32	5.1	6.6
Saurornitholestinae	3.07	4.9	1.62	5.2	6.66
Saurornitholestinae	4.78	7.02	2.04	4.16	6.66
Saurornitholestinae	4.57	6.31	1.76	4.5	6.7
Saurornitholestinae	2.28	2.64	1.16	4.5	6.8
Saurornitholestinae	4.15	8.38	1.8	5.1	6.8
Saurornitholestinae	4.69	8.01	2.28	3.58	6.86
Saurornitholestinae	5.77	11.03	2.41	4.5	6.88
Saurornitholestinae	4.15	5.06	1.64	4.75	7
Saurornitholestinae	4.15	6.39	1.76	4	7
Saurornitholestinae	3.15	5.4	1.44	5.75	7
Saurornitholestinae	4.81	7.47	1.82	5	7
Saurornitholestinae	2.91	3.9	1.36	5	7
Saurornitholestinae	2.28	2.76	1.08	4.8	7
Saurornitholestinae	4.19	6.81	1.82	4.5	7
Saurornitholestinae	3.74	4.69	1.56	5	7
Saurornitholestinae	2.99	5.23	1.5	5.25	7
Saurornitholestinae	3.15	5.98	1.56	5.2	7
Saurornitholestinae	4.26	7.19	1.98	4.32	7.02
Saurornitholestinae	4	7.9	2	4.4	7.1
Saurornitholestinae	2.49	5.06	1.28	5.2	7.14
Saurornitholestinae	3.82	5.06	1.74	4.3	7.2
Saurornitholestinae	3.98	6.56	1.82	4.75	7.25
Saurornitholestinae	4.73	6.83	1.89	5.16	7.38
Saurornitholestinae	4.15	6.31	1.8	4.9	7.4
Saurornitholestinae	4.48	5.77	1.8	5.1	7.4
Saurornitholestinae	3.57	4.81	1.38	4.3	7.5
Saurornitholestinae	3.7	4.5	1.5	5	7.5
Saurornitholestinae	3.9	4.98	1.64	4.6	7.5
Saurornitholestinae	3.08	3.24	1.24	4.6	7.6
Saurornitholestinae	3.98	6.72	1.66	5	7.6
Saurornitholestinae	4.23	7.55	1.64	5.5	7.7
Saurornitholestinae	3.9	6.39	1.8	4.8	7.7
Saurornitholestinae	3.65	5.56	1.52	5	7.7
Saurornitholestinae	3.98	5.48	1.68	5.3	7.7
Saurornitholestinae	2.44	3.28	1.12	6.1	7.7
Saurornitholestinae	3.2	4.32	1.3	5.6	7.7
Saurornitholestinae	4.32	5.48	1.88	4.7	7.7
Saurornitholestinae	5.49	7.36	2.6	4	7.74
Saurornitholestinae	3.4	6.31	1.72	5	7.8
Saurornitholestinae	3.65	5.23	1.6	5.2	7.8
Saurornitholestinae	3.07	4.23	1.24	5.4	7.9
Saurornitholestinae	3.74	5.89	1.72	5	8
Saurornitholestinae	2.64	3.4	1.16	5	8
Saurornitholestinae	3.4	4.98	1.48	5	8
Saurornitholestinae	3.57	4.48	1.52	5	8
Saurornitholestinae	4.23	4.48	1.88	4.3	8
Saurornitholestinae	2.91	4.9	1.12	5.75	8
Saurornitholestinae	2	2.72	0.86	8	8
Saurornitholestinae	2.36	2.52	1.1	5.7	8
Saurornitholestinae	3.4	4.9	1.58	5.3	8
Saurornitholestinae	3.74	5.23	1.76	5.4	8
Saurornitholestinae	4.57	6.64	1.92	4.5	8
Saurornitholestinae	2.4	2.88	0.9	7.8	8
Saurornitholestinae	2.82	3.32	1.3	5.5	8
Saurornitholestinae	4.15	5.64	1.74	5	8
Saurornitholestinae	3.5	4.1	1.6	5	8
Saurornitholestinae	2.2	2.84	1.02	7	8
Saurornitholestinae	4.07	5.98	1.54	5.6	8
Saurornitholestinae	2.57	3.69	1.28	6	8
Saurornitholestinae	4.48	5.89	1.82	4.9	8
Saurornitholestinae	5.2	7	2.6	4	8
Saurornitholestinae	4.32	6.47	1.44	5.4	8.1
Saurornitholestinae	3.9	6.14	1.62	5.3	8.1
Saurornitholestinae	2.74	4.4	1.1	6.3	8.2
Saurornitholestinae	2.66	4.15	1.12	6.2	8.2
Saurornitholestinae	3.74	5.56	1.52	5.5	8.2
Saurornitholestinae	2.82	3.61	1.24	6.3	8.2
Saurornitholestinae	3.49	5.19	1.46	5.2	8.2
Saurornitholestinae	4.48	7.06	1.7	5.2	8.2
Saurornitholestinae	2.41	2.49	1.16	5.9	8.2
Saurornitholestinae	3.4	4.57	1.58	4.9	8.3
Saurornitholestinae	3.82	7.52	1.75	6.1	8.34
Saurornitholestinae	4.7	7.67	2.17	4.34	8.42
Saurornitholestinae	2.4	3.4	1.26	5.25	8.5
Saurornitholestinae	2.4	3.4	1.02	5.6	8.5
Saurornitholestinae	2.91	3.4	1.24	5.1	8.5
Saurornitholestinae	2.6	2.94	1.04	6.2	8.5
Saurornitholestinae	3.65	6.23	1.52	5.5	8.5
Saurornitholestinae	2.8	4.7	1.1	6	8.5
Saurornitholestinae	2.72	3.72	1.1	5.25	8.6
Saurornitholestinae	5.6	8.31	2.45	5.44	8.64
Saurornitholestinae	2.32	2.74	1.04	4.6	8.7
Saurornitholestinae	3.15	4.15	1.4	5.75	8.75
Saurornitholestinae	2.57	4.07	1.3	5.9	8.8
Saurornitholestinae	3.07	4.73	1.42	5.2	8.8
Saurornitholestinae	3.57	5.48	1.38	5.5	8.8
Saurornitholestinae	2.57	3.28	1.08	6.1	8.8
Saurornitholestinae	2.49	3.49	1.02	6	8.8
Saurornitholestinae	5.5	8.35	2.34	5	8.82
Saurornitholestinae	2.08	2.32	1	6	9
Saurornitholestinae	2.49	4.81	1.28	5	9
Saurornitholestinae	2.44	3.6	1.12	6.5	9
Saurornitholestinae	3.12	3.76	1.18	6	9
Saurornitholestinae	3.24	4.15	1.24	5	9
Saurornitholestinae	2.57	3.82	1.2	7.2	9
Saurornitholestinae	3.07	5.06	1.44	6	9
Saurornitholestinae	2.83	3.4	1.12	6.2	9
Saurornitholestinae	2.32	3.49	1.16	6	9
Saurornitholestinae	3.98	5.23	1.62	4.7	9
Saurornitholestinae	3.15	4.07	1.16	5.5	9
Saurornitholestinae	2.49	4.15	1.06	6	9
Saurornitholestinae	4.9	7.3	1.64	5.5	9
Saurornitholestinae	3.07	3.4	1.36	5	9
Saurornitholestinae	3.7	6.8	1.5	6	9
Saurornitholestinae	2.99	3.9	1.26	5.1	9
Saurornitholestinae	2.66	5.06	1.62	6	9
Saurornitholestinae	3.4	4.98	1.4	5.9	9.2
Saurornitholestinae	2.57	3.82	1.06	6.75	9.2
Saurornitholestinae	2.41	3.61	0.98	6.1	9.3
Saurornitholestinae	3.49	5.48	1.76	6	9.5
Saurornitholestinae	3.15	3.98	1.3	5.5	9.5
Saurornitholestinae	2.32	3.24	1.04	6.15	9.5
Saurornitholestinae	3.65	4.57	1.64	5.1	9.5
Saurornitholestinae	3.74	5.94	1.42	6	9.5
Saurornitholestinae	2.36	2.76	0.94	5.8	9.7
Saurornitholestinae	2.16	3.24	0.98	5.4	9.7
Saurornitholestinae	4.57	6.56	1.83	5	10
Saurornitholestinae	3.9	5.48	1.76	5	10
Saurornitholestinae	2.74	5.06	1.12	6.5	10
Saurornitholestinae	2.8	3.12	1.32	5.5	10
Saurornitholestinae	3.07	5.15	1.56	5.25	10
Saurornitholestinae	2.08	2.52	0.88	8	10
Saurornitholestinae	1.64	2.28	0.8	8	10
Saurornitholestinae	2.24	2.49	0.96	6.5	10
Saurornitholestinae	2.32	3.82	0.94	6.7	10
Saurornitholestinae	3.9	6.23	1.76	4.76	10
Saurornitholestinae	3.98	6.89	1.88	5.6	10
Saurornitholestinae	2.1	3.4	1.1	7	10
Saurornitholestinae	1.64	1.88	0.72	7	10
Saurornitholestinae	2.57	2.82	1.02	6	10
Saurornitholestinae	3.24	5.06	1.28	5.4	10.3
Saurornitholestinae	2.74	4.57	1.26	5.3	10.6
Saurornitholestinae	3.57	6.23	1.6	4.7	10.6
Saurornitholestinae	2.32	2.66	1.18	4.7	10.8
Saurornitholestinae	1.84	2.2	0.84	6	11
Saurornitholestinae	4.4	6.89	1.68	5.5	11
Saurornitholestinae	1.76	2	0.84	6	11
Saurornitholestinae	2.91	4.07	1.26	5.5	11
Saurornitholestinae	2.74	4.07	1.1	6.1	11
Saurornitholestinae	3.3	5.2	1.2	5.5	11
Saurornitholestinae	2.32	3.07	1.02	6	11
Saurornitholestinae	2.91	5.23	1.46	5.9	11.5
Saurornitholestinae	2.74	3.74	1.06	6.2	11.5
Saurornitholestinae	2.57	2.99	1.12	6	11.5
Saurornitholestinae	1.96	2.48	0.8	5.7	11.6
Saurornitholestinae	1.91	2.57	0.9	6	12.4
Saurornitholestinae	4.23	5.98	1.72	6	13
Saurornitholestinae	2.57	3.15	1.16	6	15
Saurornitholestinae	2.16	3.57	1.26	5.7	0
Saurornitholestinae	2.16	3.86	1.26	5.5	0
Saurornitholestinae	2.52	2.88	1	6.6	0
Saurornitholestinae	3.07	5.31	1.52	5.1	0
Saurornitholestinae	3.49	5.98	1.74	5.6	0
Saurornitholestinae	3.98	6.72	1.66	4.9	0
Saurornitholestinae	2.49	2.66	1.36	5.8	0
Saurornitholestinae	3.74	6.56	1.32	5.5	0
Saurornitholestinae	3.32	5.64	1.38	5.7	0
Saurornitholestinae	2.91	5.48	1.26	5.5	0
Saurornitholestinae	1.91	3.65	1.02	8	0
Saurornitholestinae	2.45	2.66	1.16	7.5	0
Saurornitholestinae	4.07	5.31	1.6	4.7	0
Saurornitholestinae	3.57	5.81	1.46	5.5	0
Saurornitholestinae	3.57	5.23	1.66	5.3	0
Saurornitholestinae	3.07	5.48	1.52	5.6	0
Saurornitholestinae	3.4	5.48	1.64	5.2	0
Saurornitholestinae	3.57	6.47	1.52	4.8	0
Saurornitholestinae	2	2.1	1.1	7	0
Saurornitholestinae	2.64	3.48	1	7.5	0
Saurornitholestinae	3.07	4.73	1.08	5.6	0
Saurornitholestinae	3.15	5.73	1.56	5.5	0
Saurornitholestinae	2.16	3.82	1.44	6.1	0
Saurornitholestinae	3.49	6.47	1.6	5.2	0
Saurornitholestinae	3.74	4.81	1.36	6	0
Saurornitholestinae	1.74	3.32	0.92	7.1	0
Saurornitholestinae	3.15	3.49	1.4	5	0
Saurornitholestinae	2.41	4.07	1.48	5	0
Saurornitholestinae	3.07	5.56	1.78	5.1	0
Saurornitholestinae	2.1	3.4	0.9	7	0
Saurornitholestinae	2.1	3.5	0.7	5	0
Saurornitholestinae	2.8	6.5	1.4	4.5	0
Saurornitholestinae	3.4	8.1	1.9	4.25	0
Saurornitholestinae	4.2	8.5	2	4.5	0
Saurornitholestinae	4.4	8.5	1.9	4	0
Saurornitholestinae	2.9	6	1.5	4	0
Saurornitholestinae	1.9	4.7	1	5.5	0
Saurornitholestinae	5	12.5	2.2	4	0
Saurornitholestinae	5	13.5	2.2	4.5	0
Saurornitholestinae	6	12	2.9	4	0
Saurornitholestinae	5.3	11.3	3.2	3.75	0
Saurornitholestinae	6.9	13	3.1	4	0
Saurornitholestinae	2	5	1.1	5	0
Saurornitholestinae	4.4	10.3	2.3	4	0
Saurornitholestinae	3.8	7.91	2.25	3.88	0
Saurornitholestinae	2.7	4.2	1.1	6.5	0
Saurornitholestinae	2	4.6	1	6	0
Saurornitholestinae	2.4	4.8	1.1	5.5	0
Saurornitholestinae	2.2	4.1	0.7	7	0
Saurornitholestinae	4.6	6.7	1.7	5	0
Saurornitholestinae	3.7	6.7	1.8	4.25	0
Saurornitholestinae	1.9	2.8	0.7	6.5	0
Saurornitholestinae	2.4	3.9	0.9	6.5	0
Saurornitholestinae	1.9	5	1	5	0
Saurornitholestinae	4.2	6.3	1.5	4.5	0
Saurornitholestinae	3.9	9	1.9	4.25	0
Saurornitholestinae	4.3	11.2	2	5	0
Saurornitholestinae	4	9.9	2.1	4	0
Saurornitholestinae	5.5	13	2.2	4	0
Saurornitholestinae	3.8	8.2	1.4	5	0
Saurornitholestinae	4.9	9.6	2.2	4	0
Saurornitholestinae	5	13	2.3	4	0
Saurornitholestinae	5.4	13	2.5	4	0
Saurornitholestinae	5.9	13	2.8	3.75	0
Saurornitholestinae	5	12	2.1	5	0
Saurornitholestinae	5.3	11.8	2.3	4.25	0
Saurornitholestinae	4.5	7.8	1.8	4.75	0
Saurornitholestinae	4.2	7.5	1.7	4	0
Saurornitholestinae	4.9	9.6	2.2	4	0
Saurornitholestinae	5.1	9.5	2.1	4	0
Saurornitholestinae	5	9.2	2.3	4	0
Saurornitholestinae	4.9	10.5	2.1	4	0
Saurornitholestinae	4.7	10.4	2.2	4.25	0
Saurornitholestinae	4.2	8	1.5	4.5	0
Saurornitholestinae	4.2	10.5	2.5	3.75	0
Saurornitholestinae	4.7	10.3	2	5	0
Saurornitholestinae	5.9	13	2.7	4	0
Saurornitholestinae	4.8	9.2	2	4	0
Saurornitholestinae	5.1	11.7	2.1	5	0
Saurornitholestinae	4.5	9.5	2.4	4	0
Saurornitholestinae	5.7	11.2	2.1	4.5	0
Saurornitholestinae	4.8	9.4	2.2	4	0
Saurornitholestinae	5.5	11.2	3.2	5	0
Saurornitholestinae	5.6	10.8	2.6	4	0
Saurornitholestinae	7.9	16	2.8	3.75	0
Saurornitholestinae	5.5	14	2.7	4.25	0
Saurornitholestinae	5.1	9	2.2	5.5	0
Saurornitholestinae	6.4	13	2.6	3.75	0
Saurornitholestinae	5	9	1.9	4.25	0
Saurornitholestinae	5.3	9	2.1	4	0
Saurornitholestinae	3.5	7.6	1.7	4	0
Saurornitholestinae	3.7	8.3	1.9	4	0
Saurornitholestinae	4.7	9.2	2.4	3.75	0
Saurornitholestinae	3.8	8.7	1.6	6	0
Saurornitholestinae	5.6	6.3	1.4	4.75	0
Saurornitholestinae	4.2	8.1	2	4.25	0
Saurornitholestinae	5.5	11.5	2.2	4.25	0
Saurornitholestinae	5.2	8.2	2.2	4.25	0
Saurornitholestinae	3.5	7.5	1.9	4.25	0
Saurornitholestinae	4.1	9.5	2.6	4.5	0
Saurornitholestinae	4.1	9.5	2.4	4	0
Saurornitholestinae	5.3	11.8	2.5	4.75	0
Saurornitholestinae	5	10.5	2.4	4	0
Saurornitholestinae	6	13	2.3	3.5	0
Saurornitholestinae	5.7	11	2.2	3.75	0
Saurornitholestinae	3.5	7.8	2	3.75	0
Saurornitholestinae	2.9	7	1.7	4.5	0
Saurornitholestinae	5	12	2.3	4	0
Saurornitholestinae	5.1	10.2	2.4	4	0
Saurornitholestinae	3.8	6.3	1.6	4.5	0
Saurornitholestinae	4.9	9.4	2.2	5.25	0
Saurornitholestinae	3.3	6.2	1.5	4.25	0
Saurornitholestinae	5.7	11.2	2.4	4.5	0
Saurornitholestinae	6.3	14.2	2.4	4	0
Saurornitholestinae	5.77	11.25	2.49	5.54	0
Saurornitholestinae	4.36	9.2	2.45	4.28	0
Saurornitholestinae	3.93	5.66	1.81	4.38	0
Saurornitholestinae	5.24	10.8	2.77	4.04	0
Saurornitholestinae	5.74	11.6	2.67	4.28	0
Saurornitholestinae	3.67	4.42	1.61	3.68	0
Saurornitholestinae	5.62	10.04	2.37	4.04	0
Saurornitholestinae	5.79	11.54	3.16	3.82	0
Saurornitholestinae	4.66	10.1	2.57	4.8	0
Saurornitholestinae	7.5	12.85	3.68	4.9	0
Saurornitholestinae	7.07	8.38	3.13	5.36	0
Saurornitholestinae	5.34	10.1	2.82	3.88	0
Saurornitholestinae	2.37	5.33	1.41	5	0
Saurornitholestinae	2.34	5.01	1.41	4	0
Saurornitholestinae	2.08	4.82	1.4	6	0
Saurornitholestinae	2.37	4.91	1.61	6	0
Saurornitholestinae	2.47	5.58	1.24	4.8	0
Saurornitholestinae	2.61	5.99	1.41	5	0
Saurornitholestinae	2.35	5.86	1.2	4.84	0
Saurornitholestinae	2.54	4.62	0.99	6.5	0
Saurornitholestinae	3.22	5.66	1.37	4.74	0
Saurornitholestinae	2.15	4.03	1.57	5	0
Saurornitholestinae	4	5.3	2	4.5	0
Saurornitholestinae	4.8	7.2	2.5	6.5	0
Saurornitholestinae	3.7	5.2	1.6	5	0
Saurornitholestinae	2.3	2.8	1.4	5	0
Saurornitholestinae	2	2.2	1.1	6	0
Saurornitholestinae	2.8	4	1.2	6	0
Saurornitholestinae	1.8	2.2	0.8	7	0
Saurornitholestinae	4	6.2	1.8	9	0
Saurornitholestinae	4	5.5	1.9	5	0
Saurornitholestinae	8.3	15	5.8	5	0
Saurornitholestinae	7	10	3.5	3.5	0
Saurornitholestinae	2	3	1.2	4.5	0
Saurornitholestinae	3.6	5.5	3.2	6.5	0
Saurornitholestinae	5.07	7.24	2.32	4.5	0
Saurornitholestinae	5.72	8.7	2.57	4.28	0
Saurornitholestinae	5.62	11.18	2.68	4.68	0
Saurornitholestinae	5.77	10.15	2.6	4.06	0
Saurornitholestinae	5.4	9.41	2.81	3.96	0
Saurornitholestinae	5.6	7.8	2.89	3.96	0
Saurornitholestinae	5.8	10.34	3.1	3.84	0
Saurornitholestinae	5.7	8.49	2.22	4.54	0
Saurornitholestinae	5.52	10.6	3.02	4.54	0
Saurornitholestinae	6.25	13.16	3.63	3.64	0
Saurornitholestinae	3.48	6.87	2.17	4.58	0
Saurornitholestinae	4.08	7.99	1.56	5	0
Saurornitholestinae	4.05	7.69	2.55	4.32	0
Saurornitholestinae	4.48	10.73	3.08	4.76	0
Saurornitholestinae	3.14	7.73	2.01	5.1	0
Saurornitholestinae	4.99	8.85	2.19	4.48	0
Saurornitholestinae	4.42	7.8		4.72	0
Saurornitholestinae	4.84	6.45	2.07	4.96	0
Troodontidae	4.7	6	2	2.4	0
Troodontidae	2.5	3.1	1.3	4	0
Troodontidae	3.5	4.1	1.7	2.4	0
Troodontidae	3.07	5.4	1.42	1.7	0
Troodontidae	6.31	8.4	3.28	1.25	0.7
Troodontidae	6.06	7.36	3.28	1.2	0.7
Troodontidae	5.81	7.64	2.96	1.4	0.75
Troodontidae	5.48	6.14	2.8	1.6	0.8
Troodontidae	5.56	8.05	3.24	1.5	0.85
Troodontidae	5.43	9.98	3.4	1.7	0.9
Troodontidae	6.2	9	3.4	1.56	0.94
Troodontidae	5.25	7.83	2.79	1.28	0.94
Troodontidae	5.73	7.52	3.24	1.7	0.95
Troodontidae	6.23	8.4	3.44	1.9	0.95
Troodontidae	6.29	8.92	3.12	1.34	1
Troodontidae	5.89	7.39	3.48	1.6	1
Troodontidae	5.78	10.68	3.68	1.3	1
Troodontidae	5.68	7.36	2.76	1.72	1.06
Troodontidae	5.31	6.64	2.76	1.3	1.1
Troodontidae	7	12.08	4.07	1.6	1.1
Troodontidae	2.4	4.48	2	1.3	1.15
Troodontidae	6.39	8.48	3.2	1.9	1.2
Troodontidae	6.31	9.44	3.68	1.6	1.2
Troodontidae	5.56	7.04	3.4	2	1.3
Troodontidae	5.98	7.76	3.28	2	1.3
Troodontidae	5.48	6.97	3.32	1.7	1.3
Troodontidae	4.29	6.5	2.73	1.64	1.4
Troodontidae	5.48	7.3	3.12	1.9	1.4
Troodontidae	4.18	5.24	1.94	1.62	1.42
Troodontidae	5.56	6.81	2.82	2	1.5
Troodontidae	5.48	6.23	2.48	2.3	1.5
Troodontidae	5.48	6.97	3.16	1.7	1.6
Troodontidae	6.13	10.68	3.57	1.4	1.6
Troodontidae	4.98	7.06	2.66	1.9	1.6
Troodontidae	5.67	7.4	3.31	2.1	1.62
Troodontidae	4.81	6.64	2.82	2.2	1.8
Troodontidae	4.99	6.92	2.81	2	1.84
Troodontidae	6.22	9.61	2.95	2	2
Troodontidae	6	9.39	3.03	1.75	2
Troodontidae	5.6	8.47	2.71	2.5	2
Troodontidae	4.96	8.61	2.55	1.78	2
Troodontidae	5.2	7.6	2.8	2	2
Troodontidae	5.7	8.7	2.6	2.4	2.2
Troodontidae	5.21	8.76	2.44	1.96	2.28
Troodontidae	3.39	4.48	1.83	2.16	2.34
Troodontidae	4.51	6.67	2.22	2.24	2.4
Troodontidae	5.85	10.38	3.33	1.92	2.42
Troodontidae	5.2	7.84	2.33	2.5	2.5
Troodontidae	4.45	7.25	1.62	2.5	2.5
Troodontidae	5.91	8.36	2.72	2.26	2.64
Troodontidae	3.4	4.9	1.58	2.4	2.7
Troodontidae	1.53	2.33	1.1	2.2	2.76
Troodontidae	4.57	6.31	2.48	2	3
Troodontidae	5.02	7.44	2.42	2.54	3.04
Troodontidae	4.92	7.22	2.43	2.25	3.76
Troodontidae	2.47	4.9	1.12	2.9	5.06
Troodontidae	2.63	4.8	1.18	3.38	5.94
Troodontidae	2.93	4.85	1.1	3.18	6.48
Troodontidae	2.52	4.3	1.22	3.82	11.58
Troodontidae	5.35	8.01	2.65	2.16	0
Troodontidae	2.97	3.89	1.53	3.38	0
Troodontidae	3.26	4.55	1.79	2.06	0
Troodontidae	4.88	6.56	2.32	2.1	0
Troodontidae	4.01	4.16	1.99	1.98	0
Troodontidae	3.45	3.37	1.55	2.98	0
Troodontidae	3.31	4.57	1.69	2.42	0
Troodontidae	2.86	3.56	1.25	3.22	0
Troodontidae	3.62	3.33	1.73	2.96	0
Troodontidae	5.83	7.72	2.93	2.04	0
Troodontidae	3.58	3.46	1.69	2.94	0
Troodontidae	2.8	5.5	1.2	2	0
Troodontidae	3.1	5.2	1.2	1.5	0
Troodontidae	2.4	3.3	0.9	2	0
Troodontidae	3.49	5.23	1.99	2.4	0
Troodontidae	3.57	4.4	2.24	2.2	0
Troodontidae	2.2	3	1	4	0
Troodontidae	2.7	4.5	1	3.75	0
Troodontidae	2.9	4.3	1.1	3.5	0
Troodontidae	2.7	4.2	1.1	4	0
Troodontidae	2.7	3.8	1	3.5	0
Troodontidae	2.6	3.1	1	4.5	0
Troodontidae	2.7	4.1	1	4	0
Troodontidae	3	3.5	1	3	0
Troodontidae	2.4	3.9	0.9	4	0
Troodontidae	2	4.1	1	3	0
Troodontidae	2.1	3.2	0.8	5	0
Troodontidae	1.9	3.4	1.3	3	0
Troodontidae	3.2	4	1	3	0
Troodontidae	2.52	4.43	1.09	1.92	0
Troodontidae	2.44	3.93	0.91	2.02	0
Troodontidae	2.39	4.22	1	1.98	0
Troodontidae	2.89	4.99	1.12	3.2	0
Troodontidae	2.74	3.88	0.96	3.06	0
Troodontidae	2.53	3.25	0.87	3.74	0
Troodontidae	2.64	3.19	0.82	3.28	0
Troodontidae	2.74	5.55	1.15	3.4	0
Troodontidae	2.31	4.26	0.93	2	0
Troodontidae	2.21	2.62	0.62	3.96	0
Troodontidae	2.36	2.73	0.63	4.04	0
Troodontidae	2.35	2.6	0.7	3.9	0
Troodontidae	3.12	5.63	1.46	1.56	0
Troodontidae	2.93	4.35	1.17	2.1	0
Troodontidae	2.56	4.5	1.07	1.74	0
Troodontidae	2.69	3.72	1.12	2.88	0
Troodontidae	2.51	3.1	1.05	3.74	0
Troodontidae	2	3	0.7	3.5	0
Troodontidae	3.2	4.6	1.1	4	0
Troodontidae	3.6	4.6	1.7	2.5	0
Troodontidae	2.2	2.9	0.9	4	0
Troodontidae	2.1	3	0.7	4.5	0
